# Supplementary material
Source: PubMed Central journal article supplement (PMC3924525)

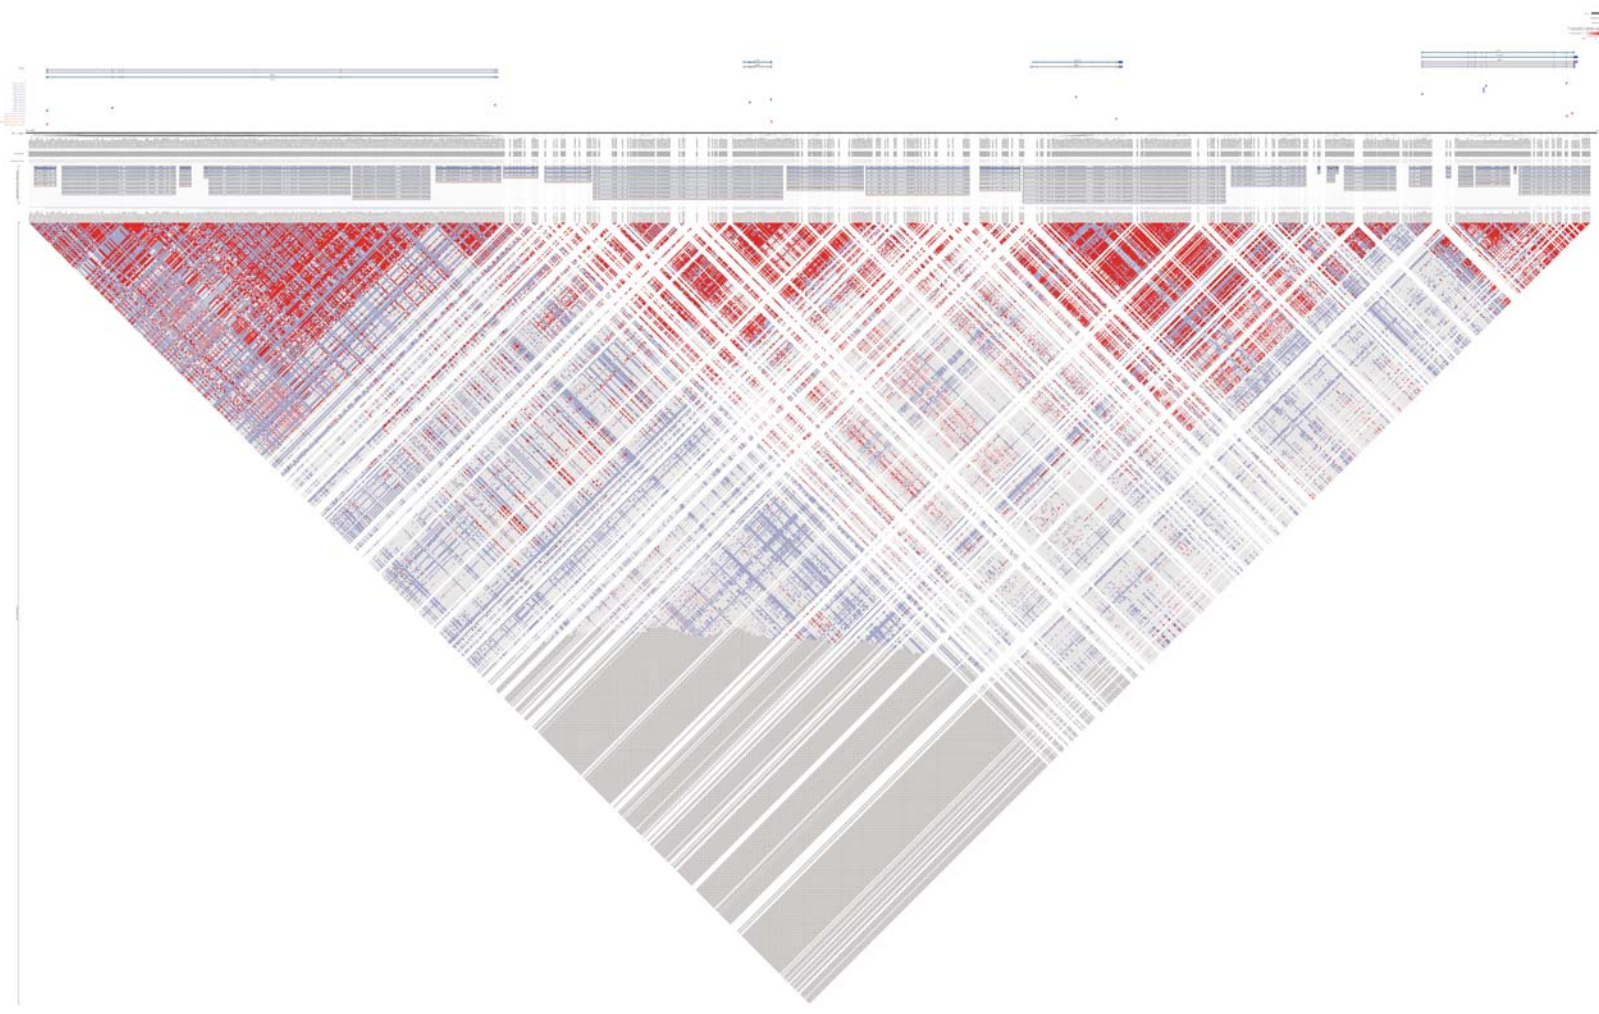

Supplement: npp2013291x1.pdf [file npp2013291x1.pdf]

**Funnel Plot of Standard Error by Log odds ratio**

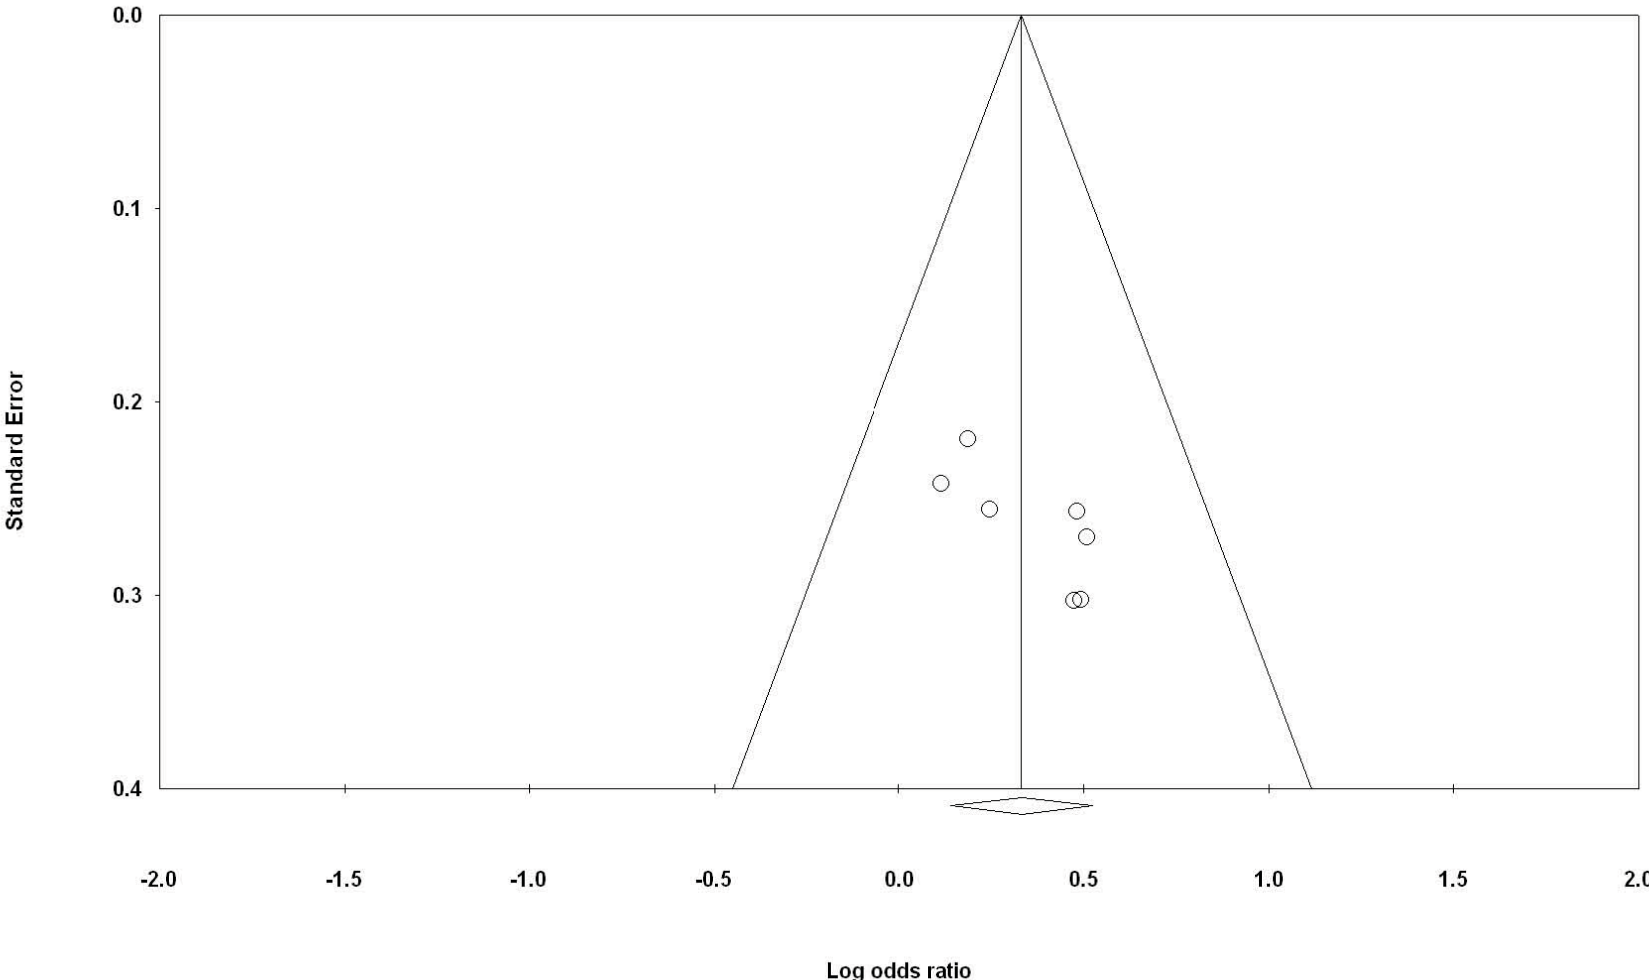

Supplement: npp2013291x10.pdf [file npp2013291x10.pdf]

**Funnel Plot of Standard Error by Log odds ratio**

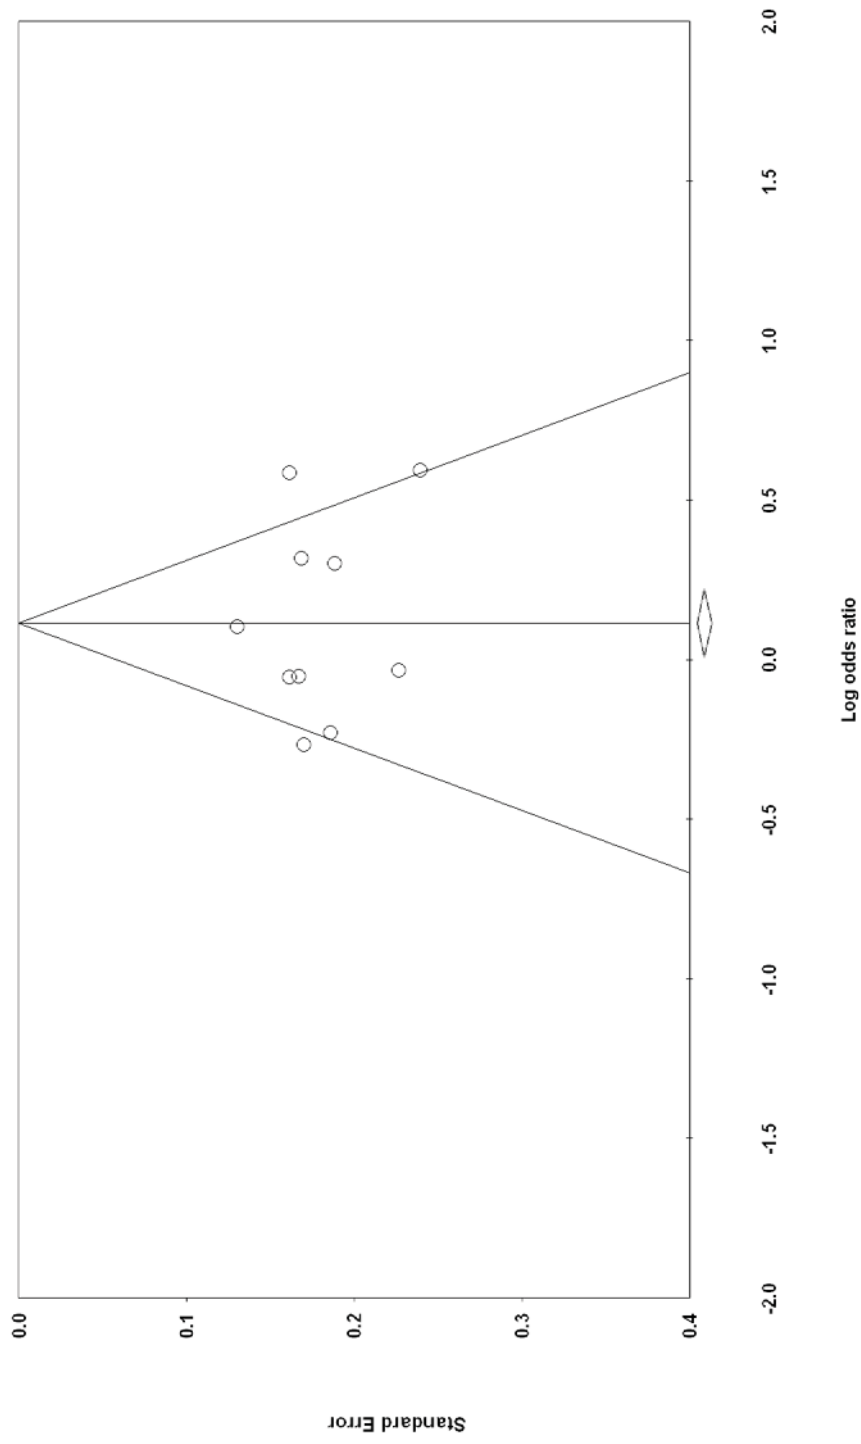

Supplement: npp2013291x11.pdf [file npp2013291x11.pdf]

Funnel Plot of Standard Error by Log odds ratio

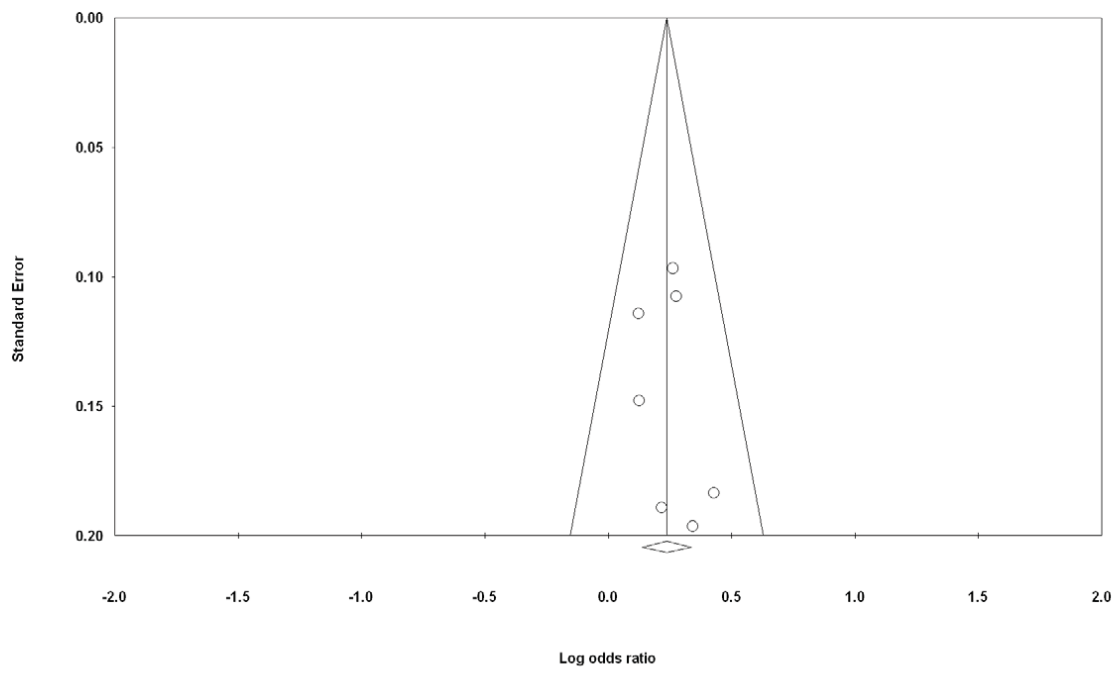

Supplement: npp2013291x12.pdf [file npp2013291x12.pdf]

Funnel Plot of Standard Error by Log odds ratio

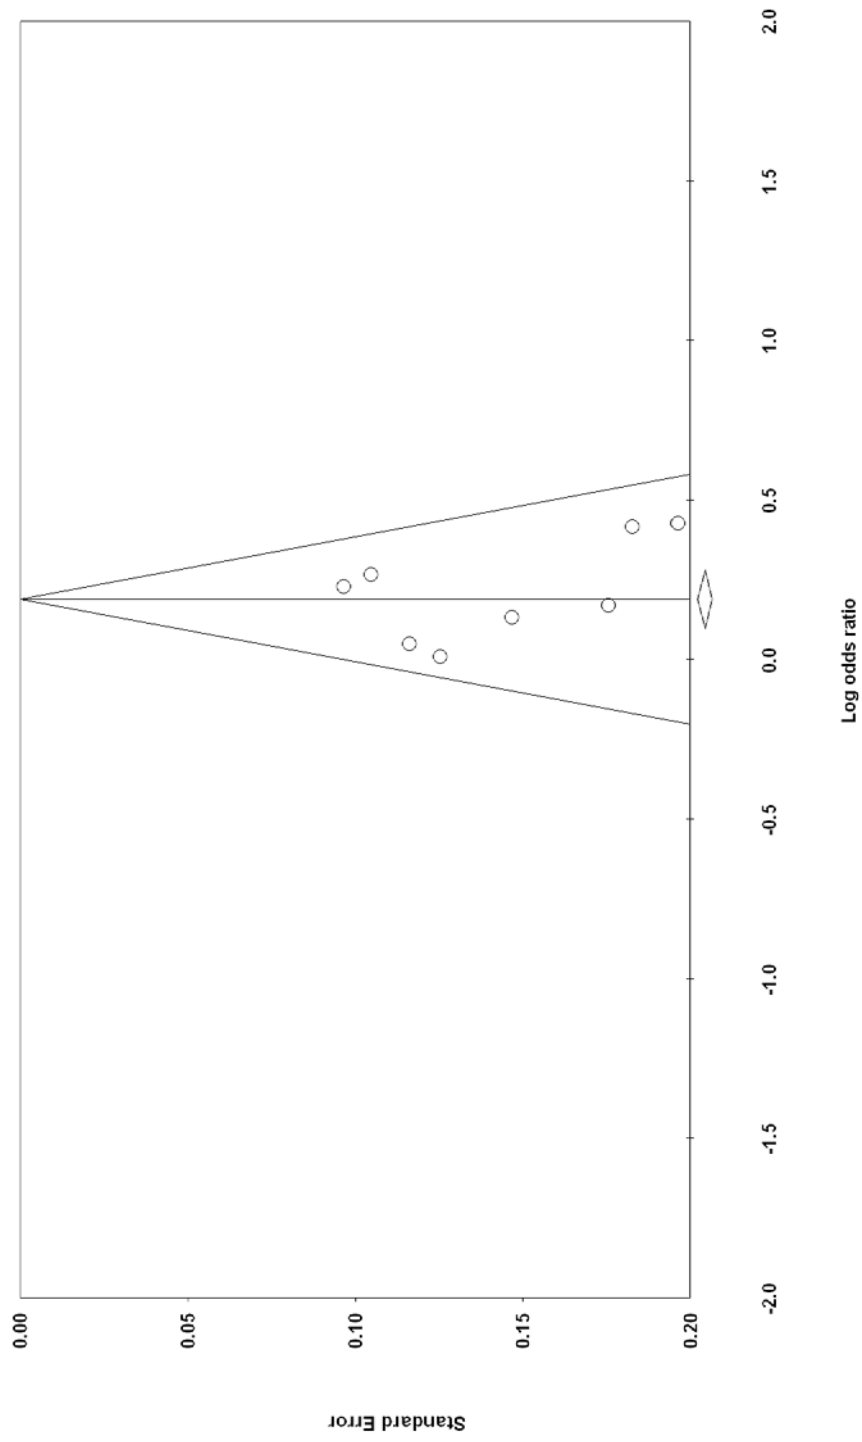

Supplement: npp2013291x13.pdf [file npp2013291x13.pdf]

# GABRG2 rs211014

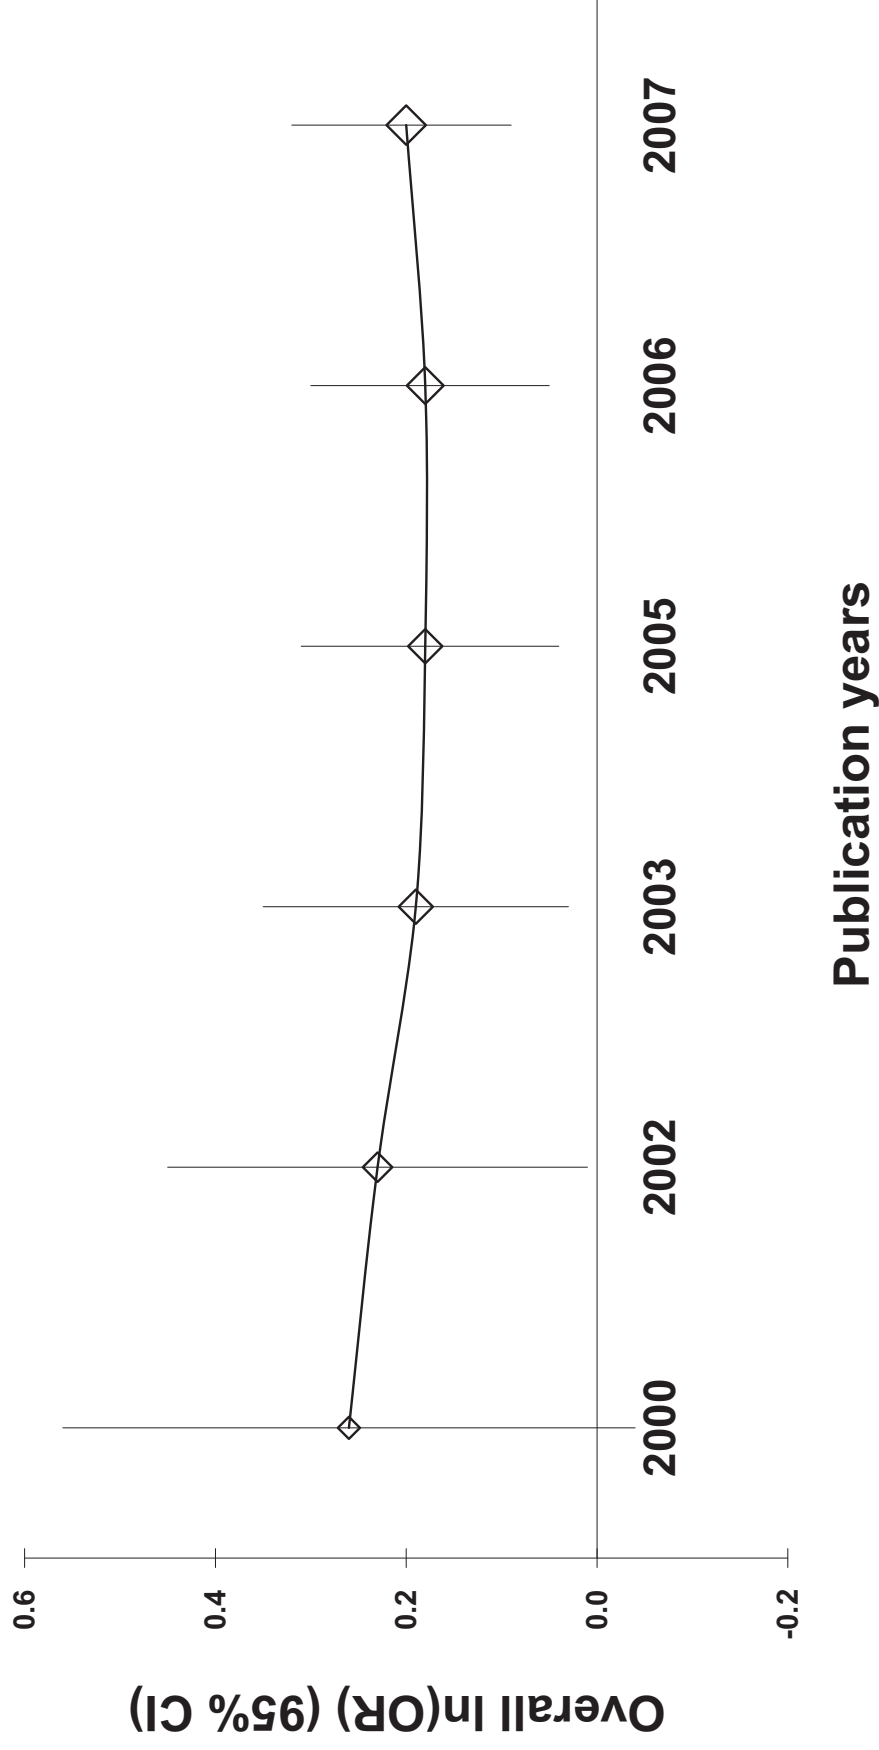

Supplement: npp2013291x14.pdf [file npp2013291x14.pdf]

# GABRG2 rs211013 (AA+AG)/GG

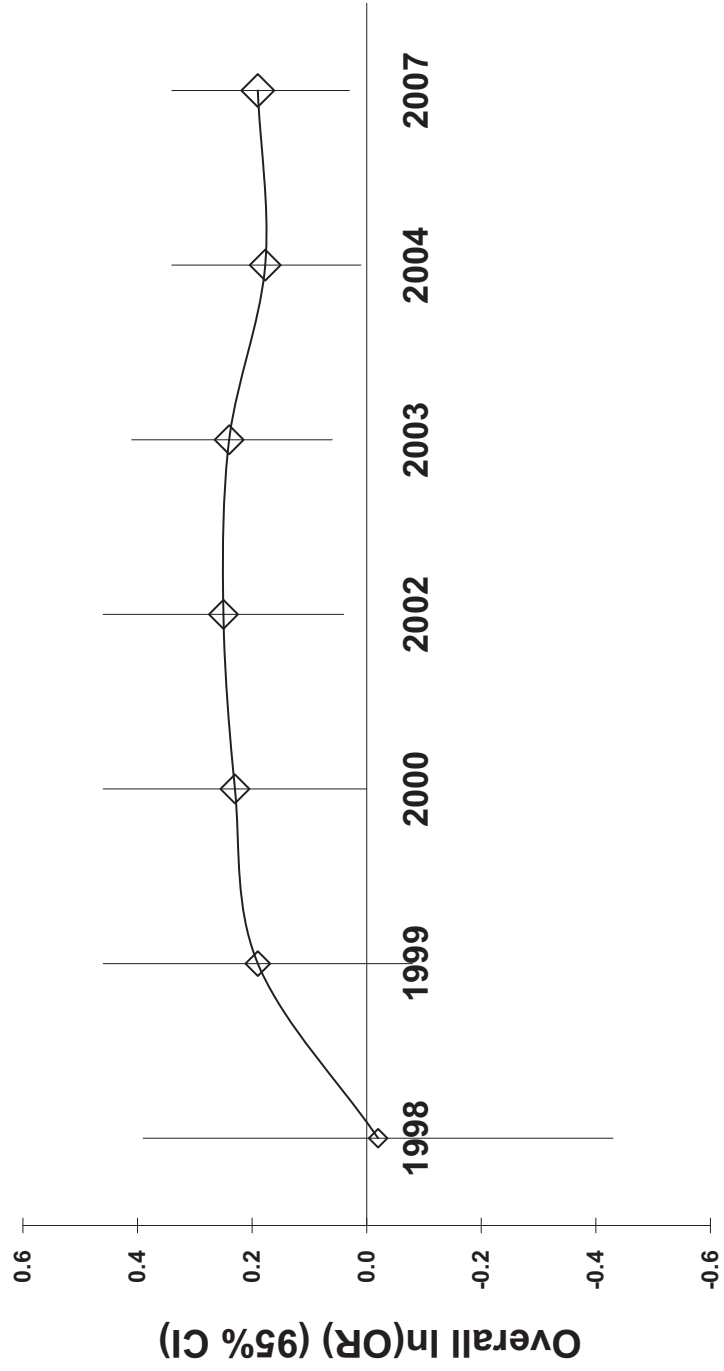

Supplement: npp2013291x15.pdf [file npp2013291x15.pdf]

# ***GABRA6* rs3219151 (AD)**

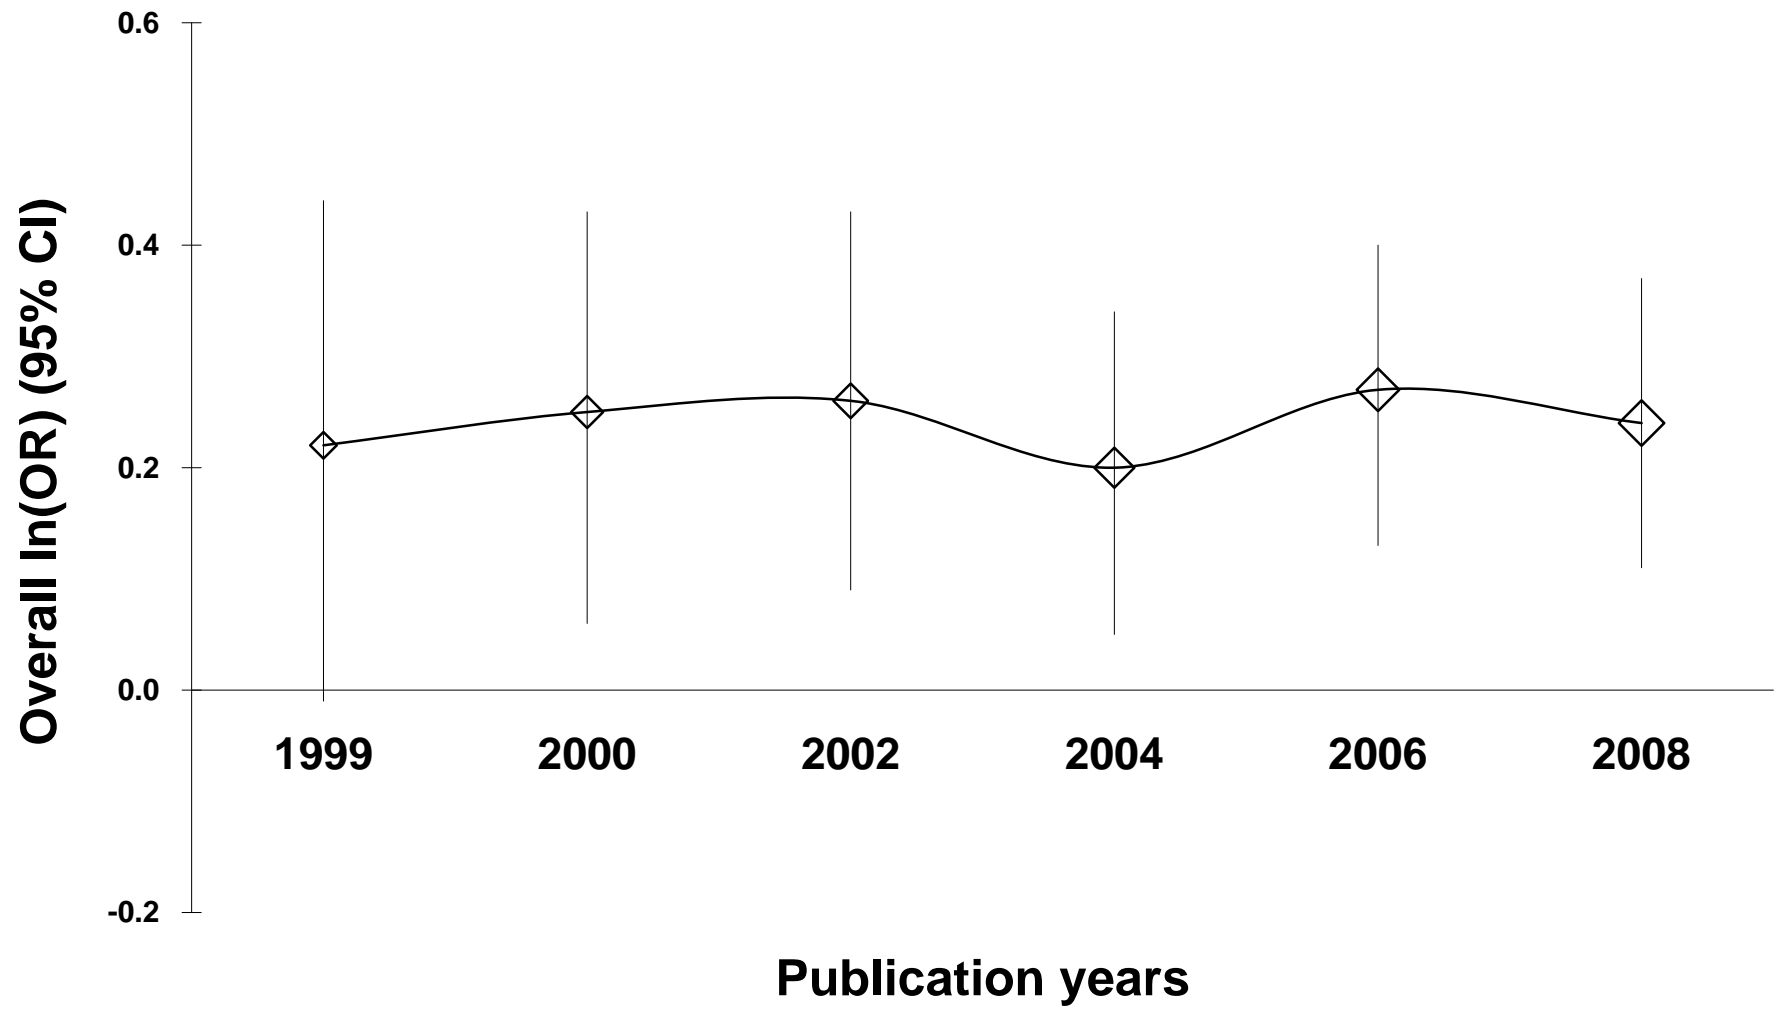

Supplement: npp2013291x16.pdf [file npp2013291x16.pdf]

# GABRA2 rs567926

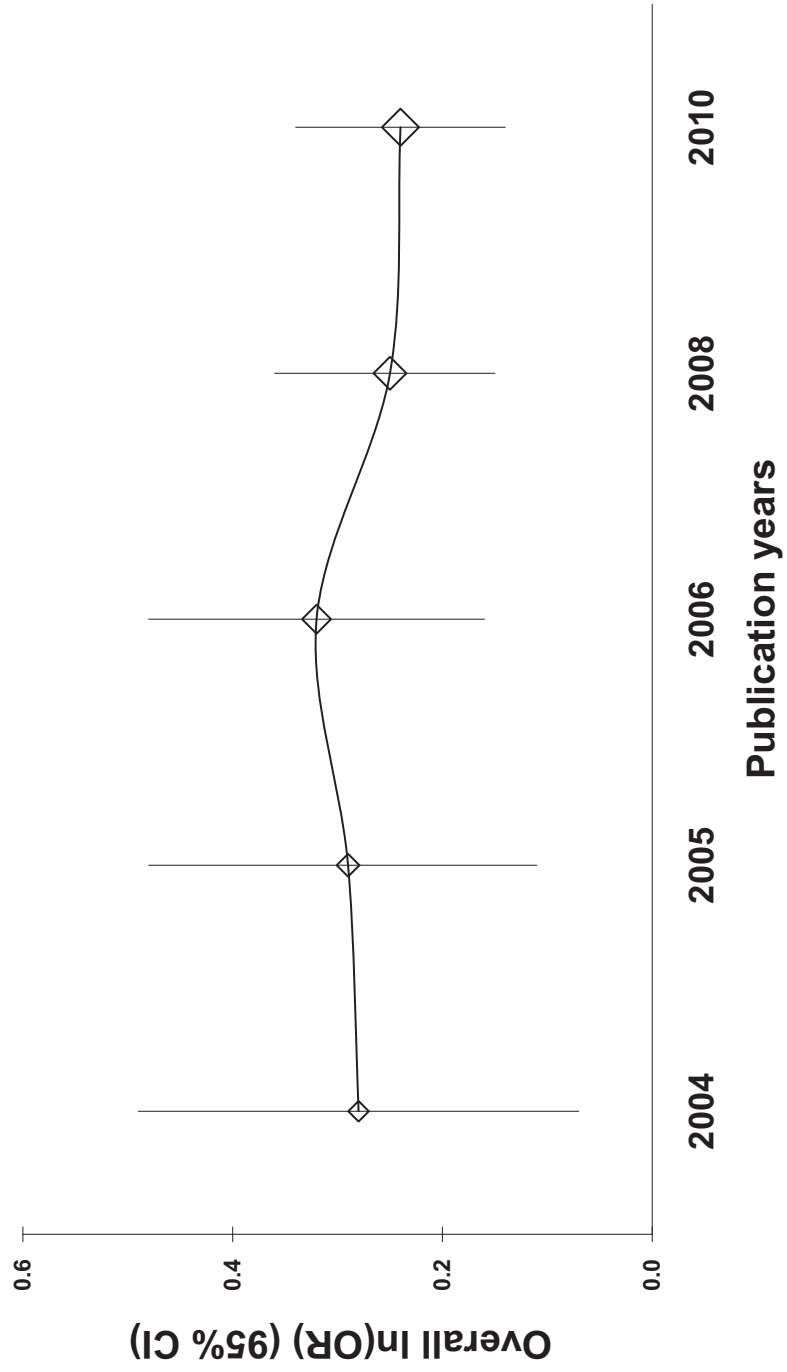

Supplement: npp2013291x17.pdf [file npp2013291x17.pdf]

# ***GABRA2* rs567926 CC/(CT+TT)**

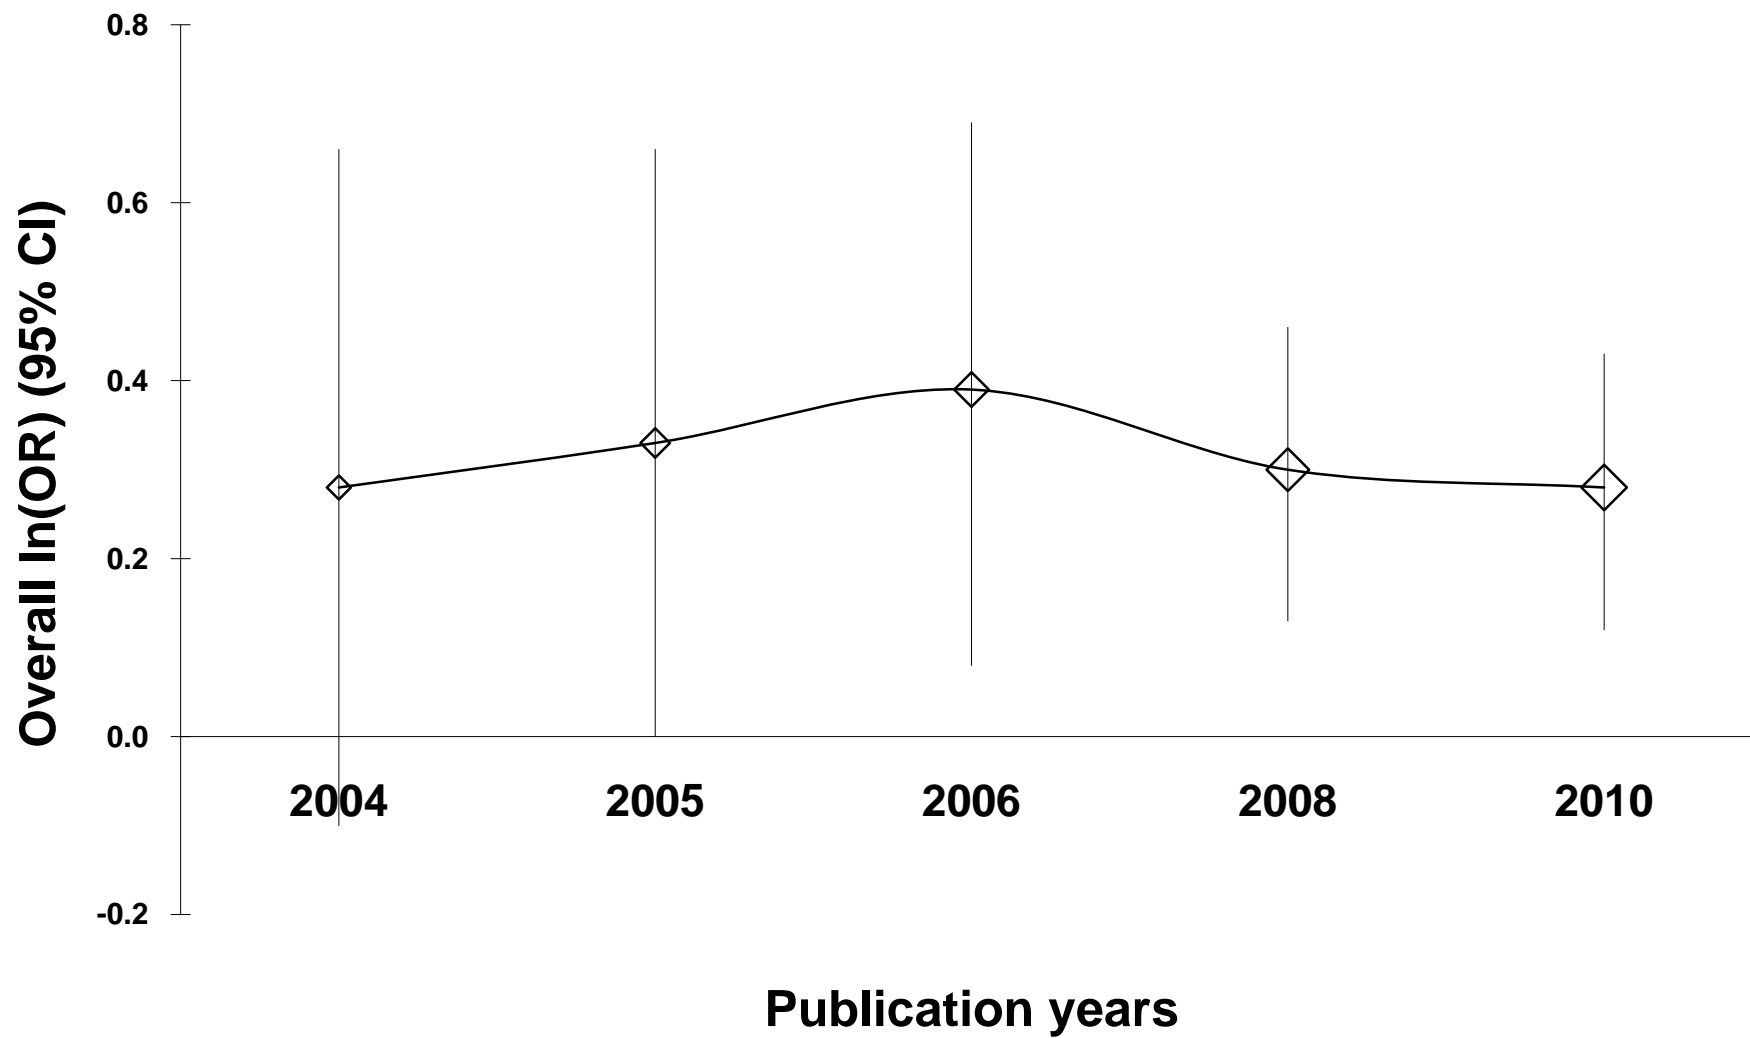

Supplement: npp2013291x18.pdf [file npp2013291x18.pdf]

## ***GABRA2* rs279858 (GG+GA)/AA**

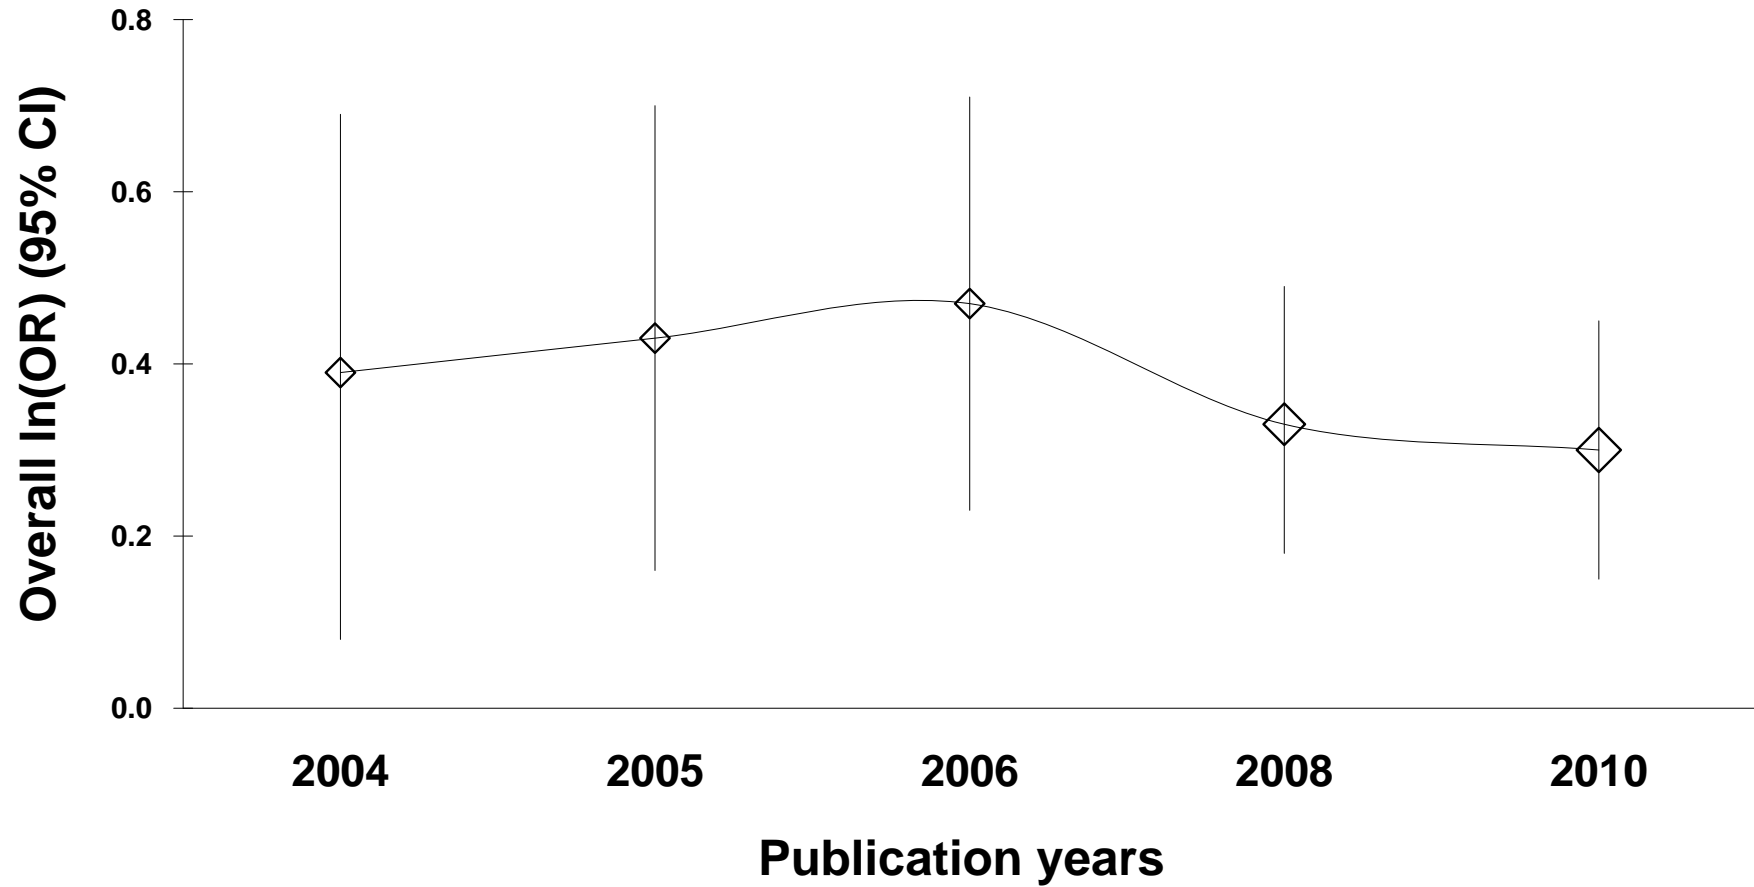

Supplement: npp2013291x19.pdf [file npp2013291x19.pdf]

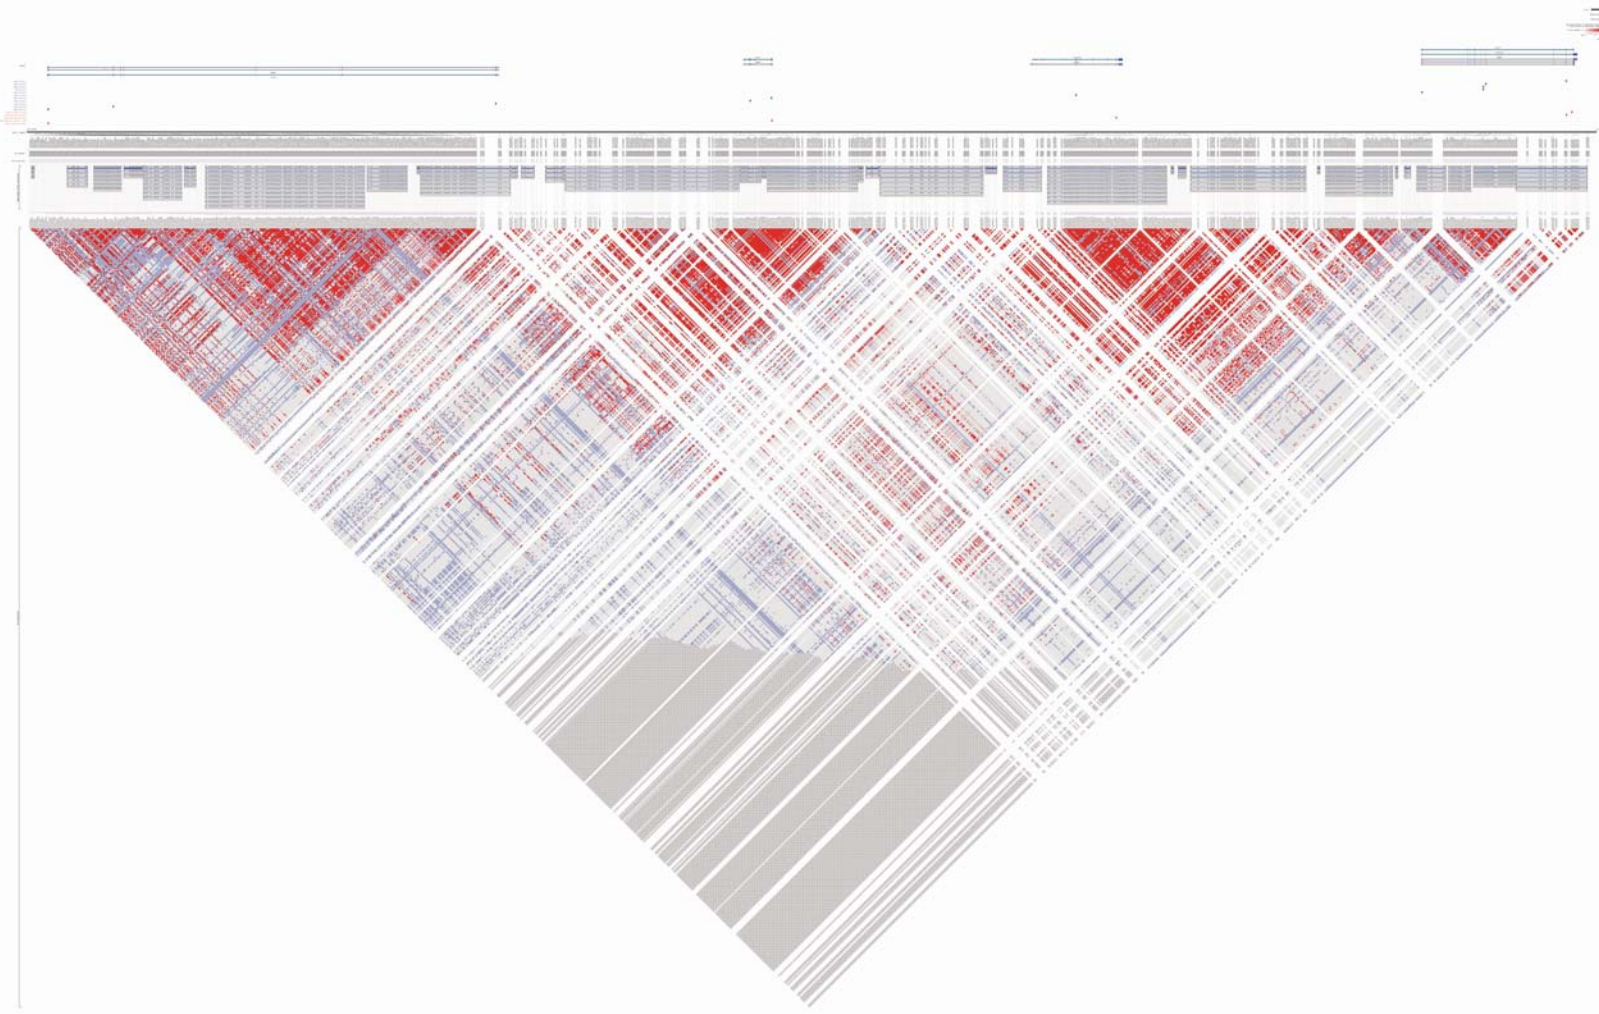

Supplement: npp2013291x3.pdf [file npp2013291x3.pdf]

### GABRA2 rs567926 (C) Allele Frequencies

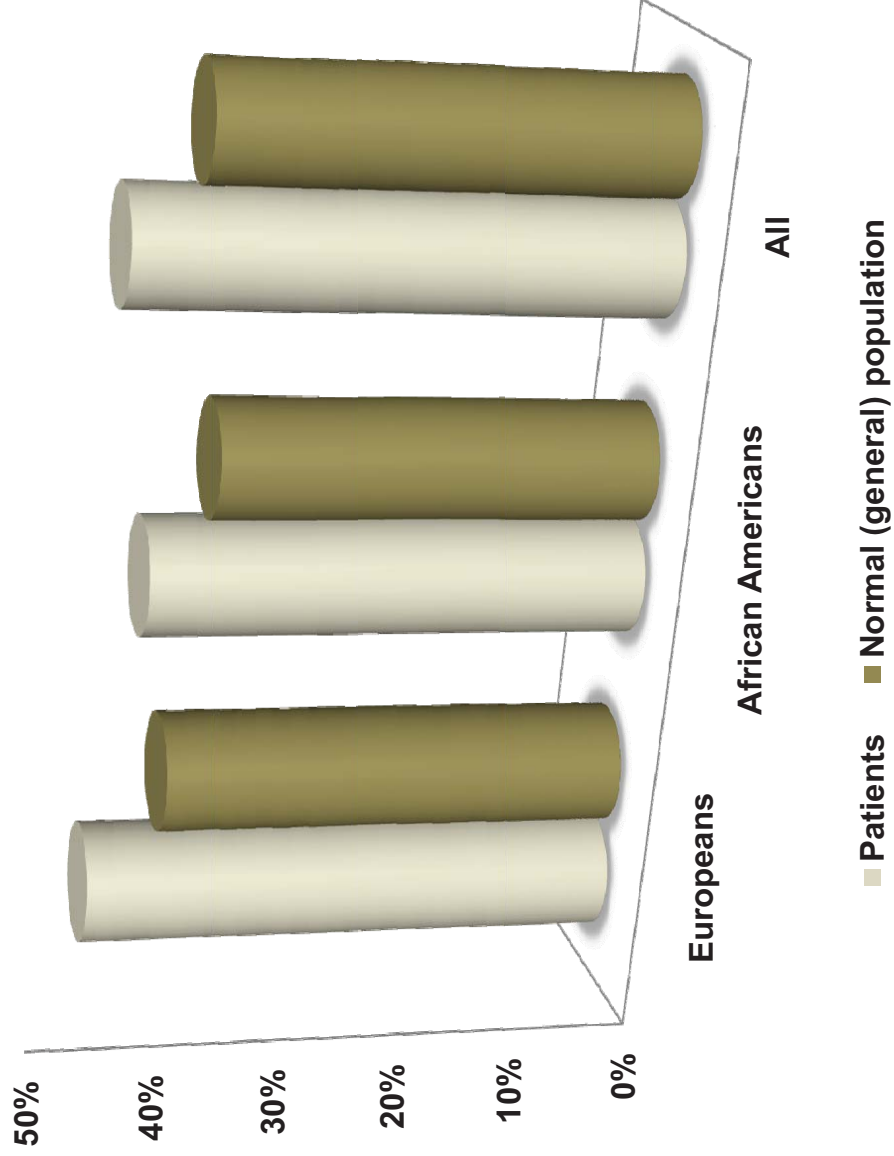

Supplement: npp2013291x5.pdf [file npp2013291x5.pdf]

## GABRA2 rs279858 (G) Allele Frequencies

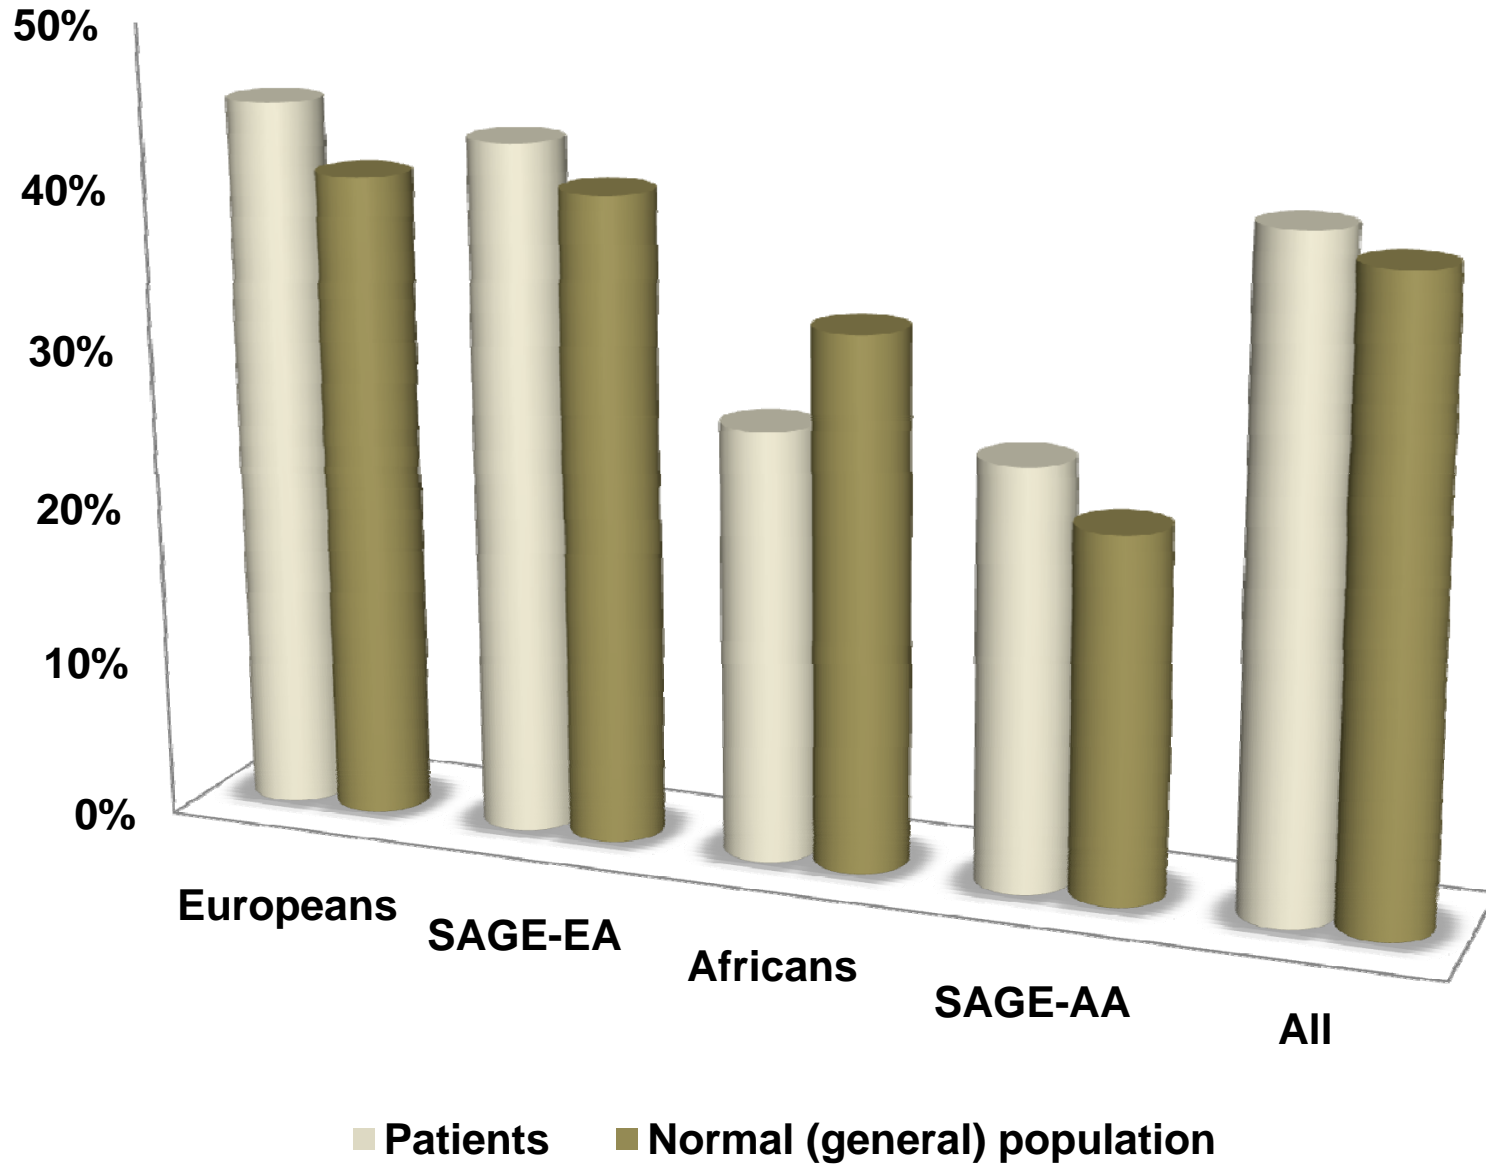

Supplement: npp2013291x6.pdf [file npp2013291x6.pdf]

Funnel Plot of Standard Error by Log odds ratio

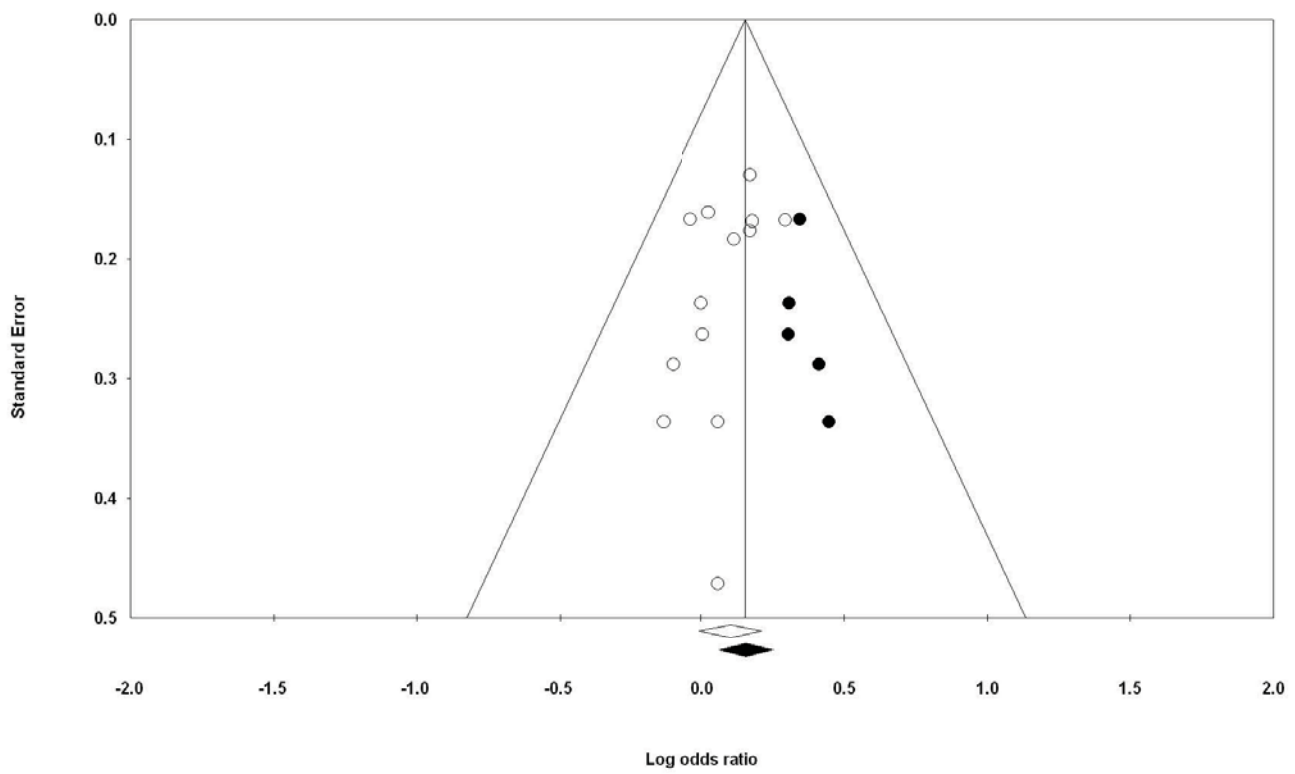

Supplement: npp2013291x7.pdf [file npp2013291x7.pdf]

**Funnel Plot of Standard Error by Log odds ratio**

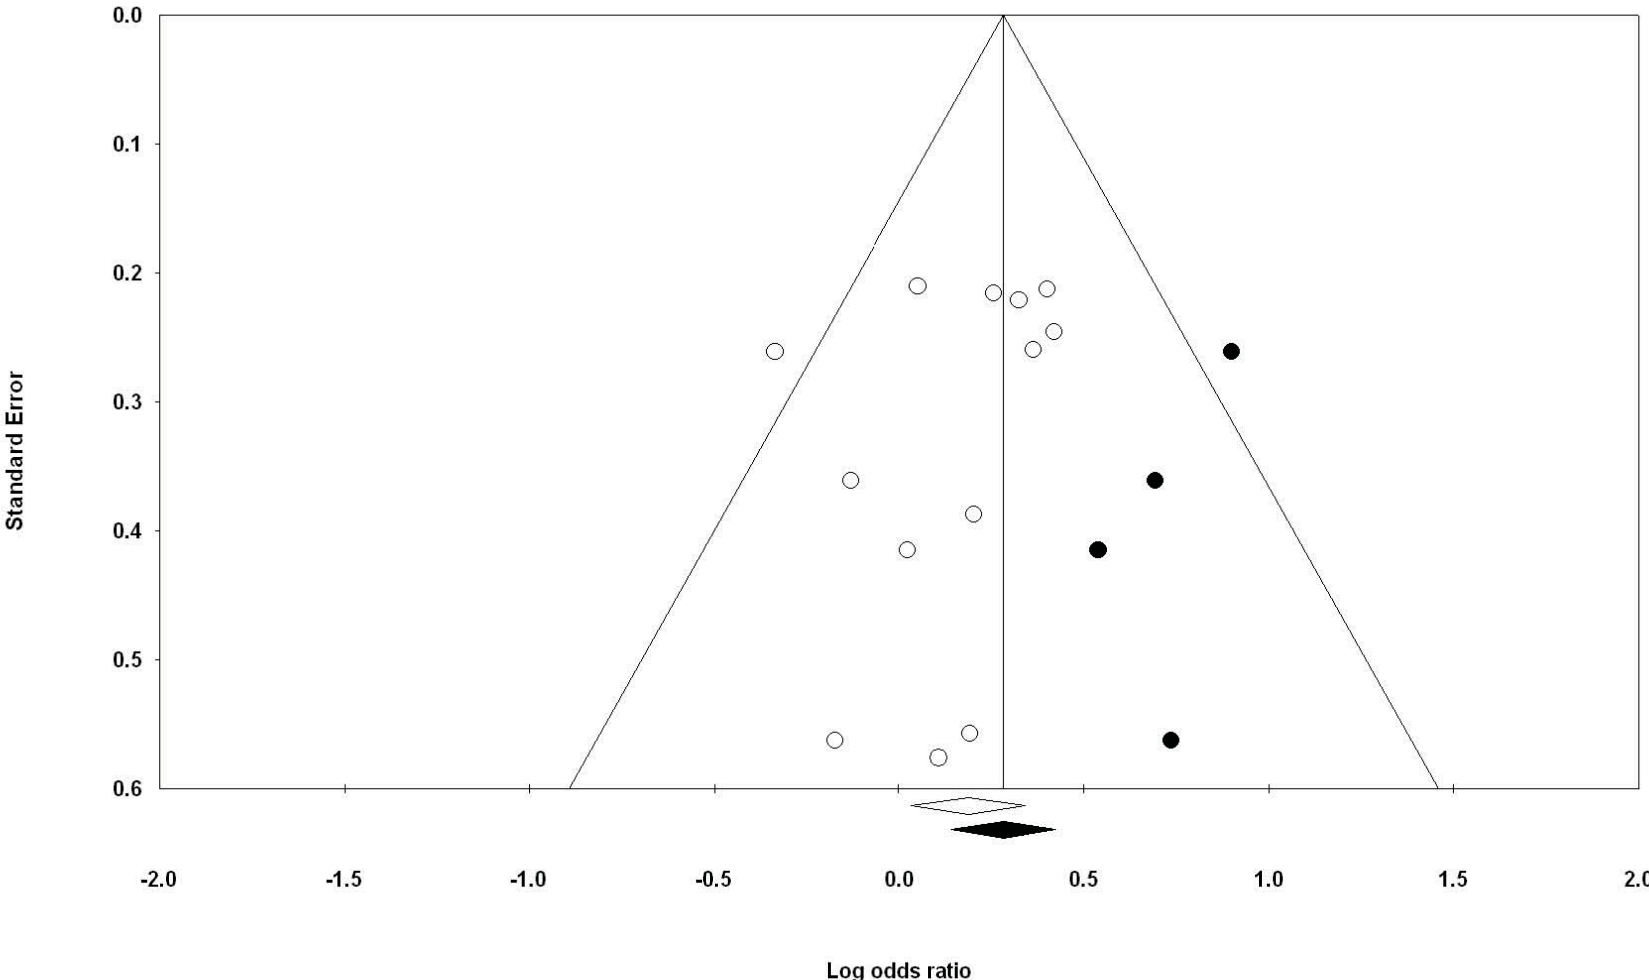

Supplement: npp2013291x8.pdf [file npp2013291x8.pdf]

Funnel Plot of Standard Error by Log odds ratio

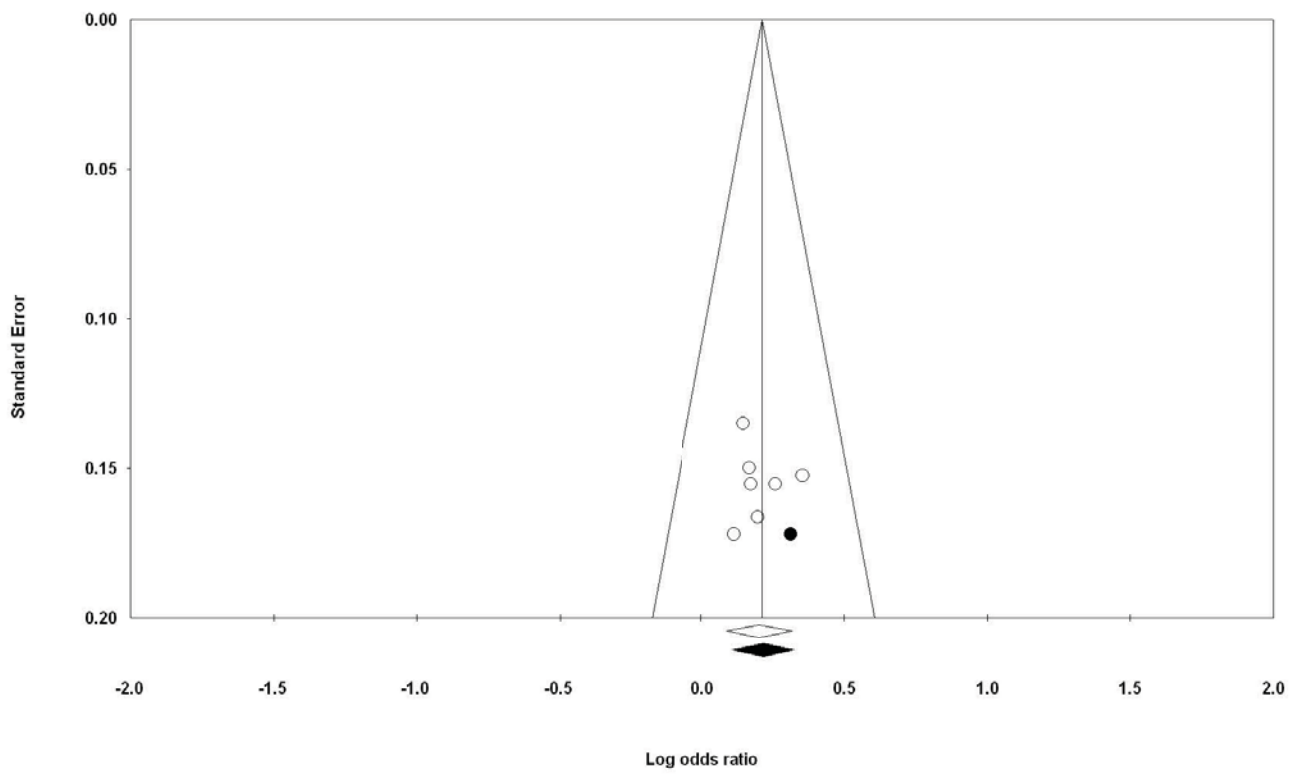

Supplement: npp2013291x9.pdf [file npp2013291x9.pdf]
